# Supplementary material
Source: PubMed Central journal article supplement (PMC5803300)

# Supplementary information, Fig. S1

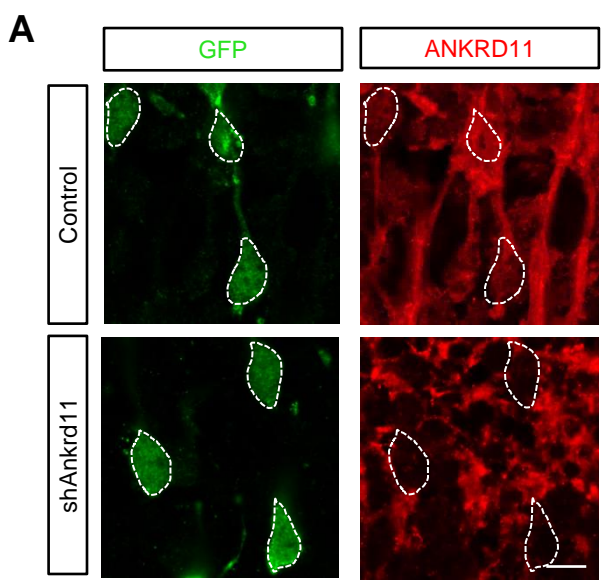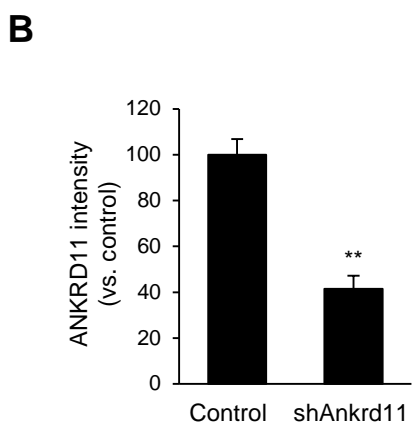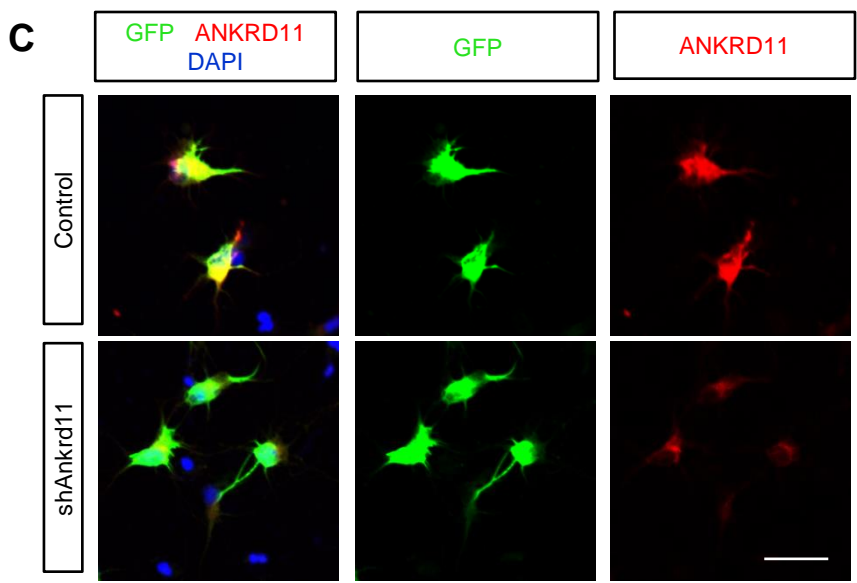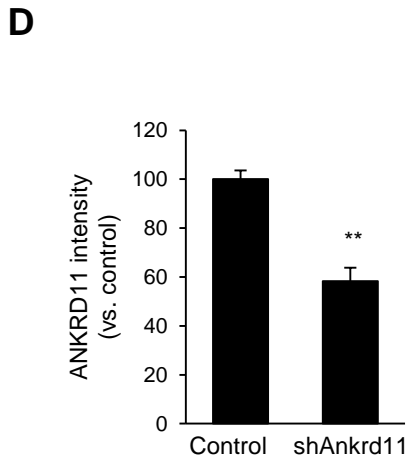

Supplement: NIHMS931425-supplement-1.pdf [file NIHMS931425-supplement-1.pdf]

# Supplementary information, Fig. S2

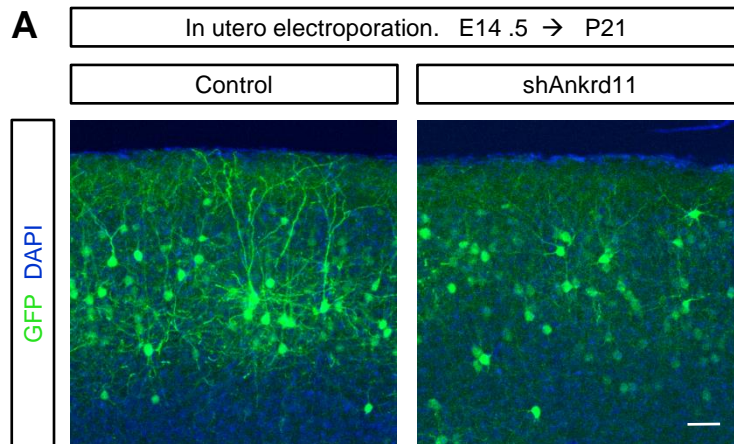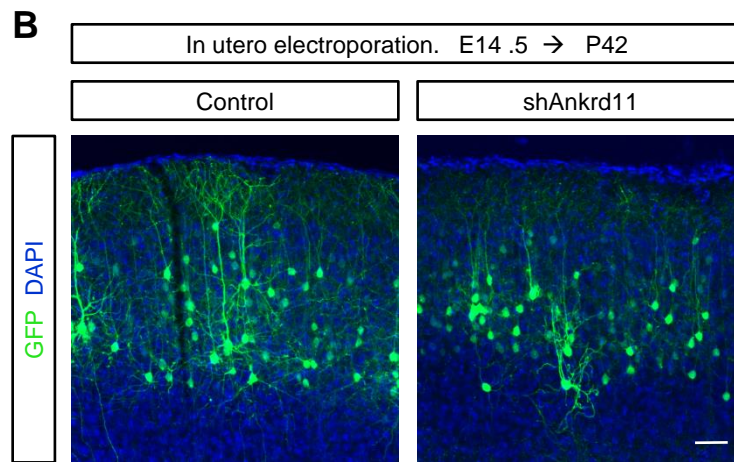

Supplement: NIHMS931425-supplement-2.pdf [file NIHMS931425-supplement-2.pdf]

# Supplementary information, Fig. S3

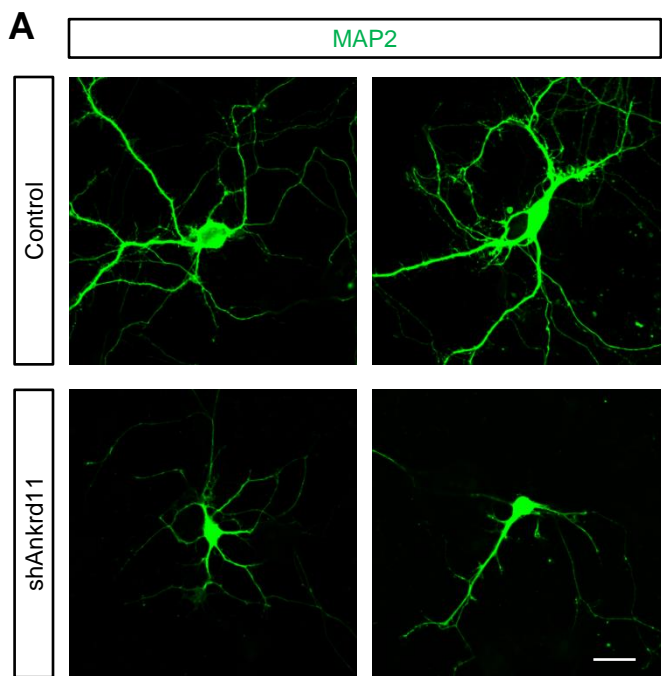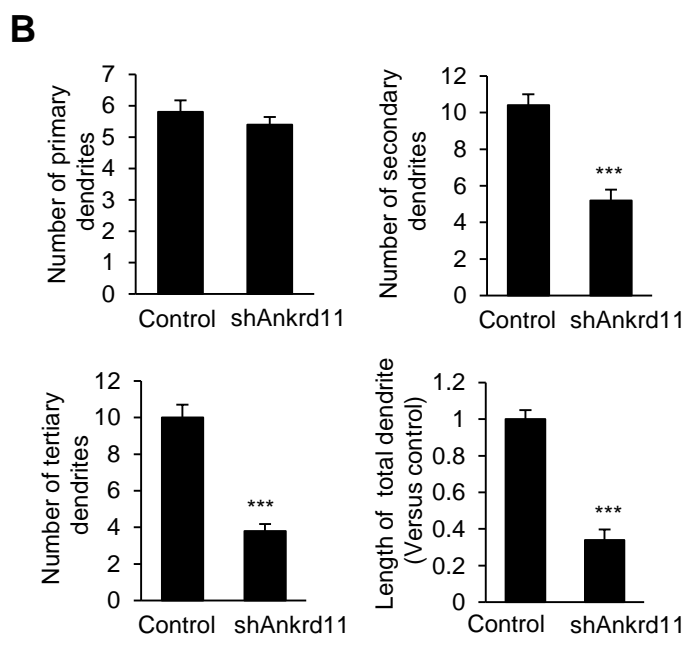

Supplement: NIHMS931425-supplement-3.pdf [file NIHMS931425-supplement-3.pdf]

# Supplementary information, Fig. S4

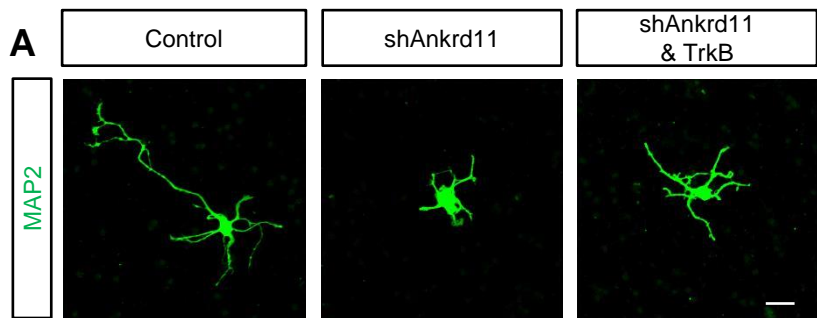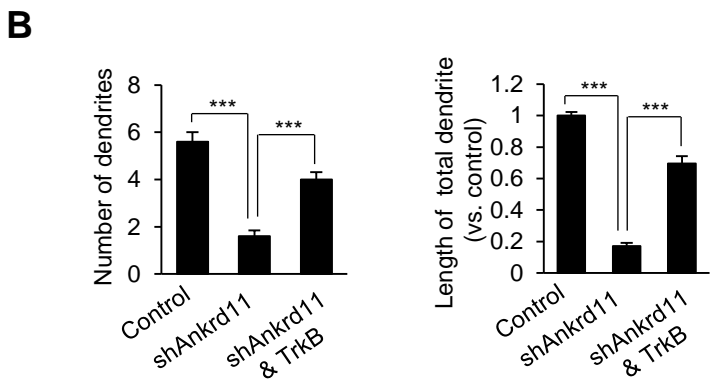

Supplement: NIHMS931425-supplement-4.pdf [file NIHMS931425-supplement-4.pdf]

# Supplementary information, Fig. S5

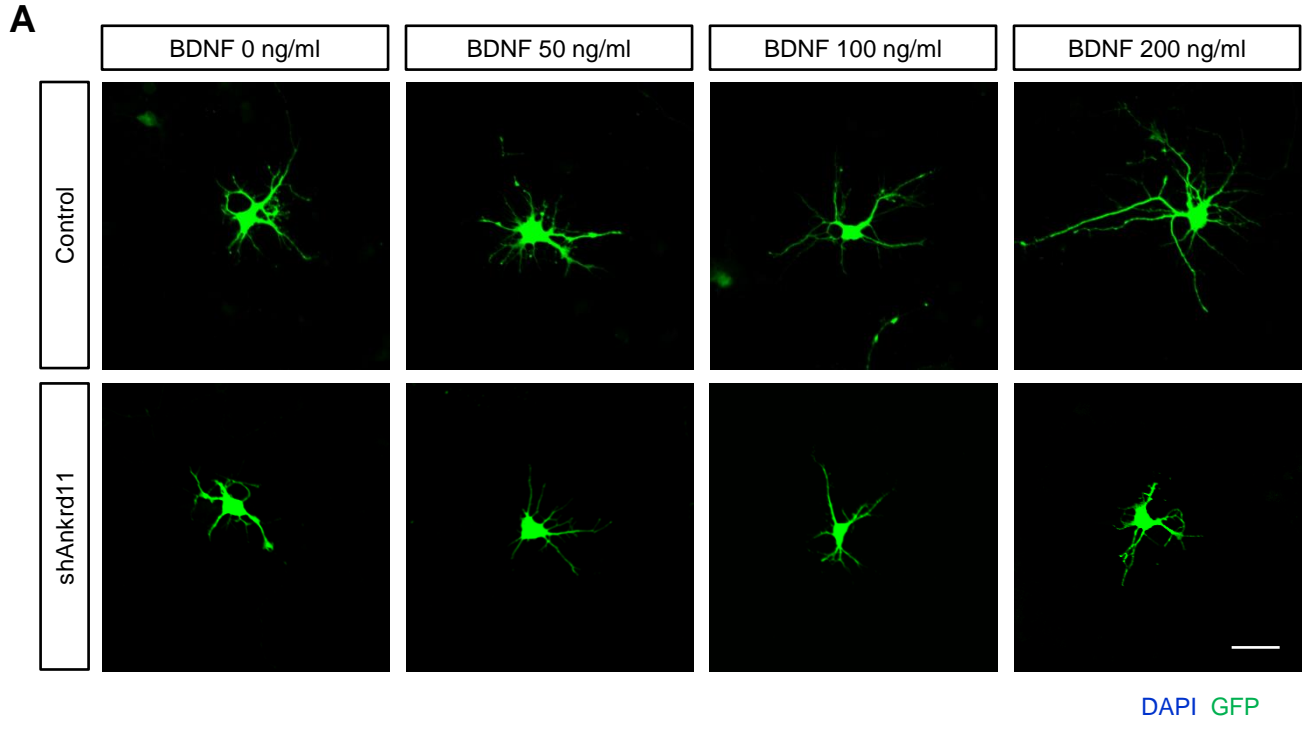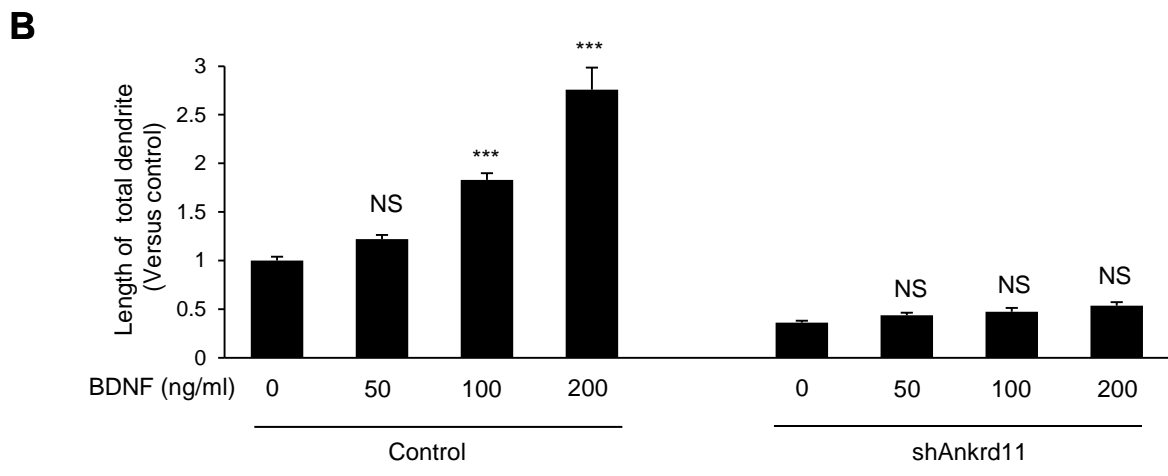

Supplement: NIHMS931425-supplement-5.pdf [file NIHMS931425-supplement-5.pdf]
